# Supplementary material for: Exploiting Polyelectrolyte Complexation for the Development of Adhesive and Bioactive Membranes Envisaging Guided Tissue Regeneration
Source: MDPI journal article supplement (doi:10.3390/jfb14010003), 2022-12-20
Supplement: s1 [file s1]

## Supplementary Materials

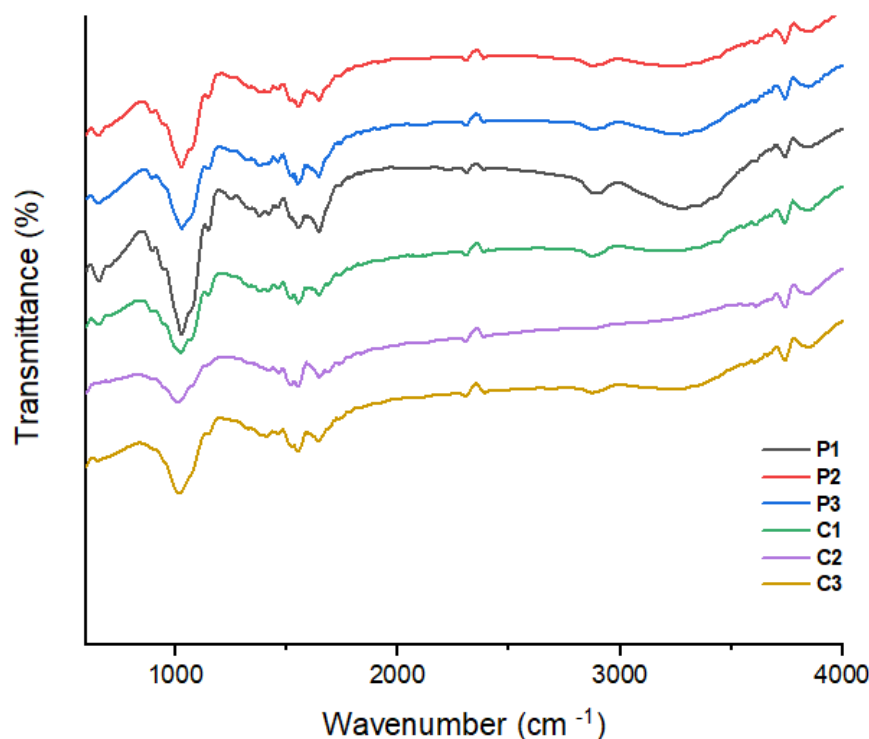

**Figure S1** - FTIR spectra of distinct CoPEC membranes.

The FT-IR results of distinct CoPEC membranes are shown in Figure S1. All membranes exhibit the characteristic bands of CHI: at 3267 cm<sup>-1</sup> from the amine and hydroxyl groups [59]; at 1392 and 1565 cm<sup>-1</sup> from the amide II of group (O=C-N-H) [60]; at 926 cm<sup>-1</sup> to 1151 cm<sup>-1</sup> there are the vibrational bands of CHI [59,61-63] and bands at 1281, 1026 and 1078 cm<sup>-1</sup> are attributed to the presence of OH-, C-O and C-N stretching [1], respectively; at 1620 and 1660 cm<sup>-1</sup> and between 1630 and 1700 cm<sup>-1</sup> correspond to C=O bands and amide I [61,63], respectively.

The characteristic peaks of HA are also detected: at 3383 cm<sup>-1</sup>, which corresponds to the -OH- [64], also detectable in a range of 3350 to 3250 cm<sup>-1</sup>; the methylene group appears around 2940 and 2920 cm<sup>-1</sup> and amide bonds stretching (C=O) are detectable in a range of 1700 to 1250 cm<sup>-1</sup>; the peak at 1560 cm<sup>-1</sup> corresponds to N-H groups; and the peak at 1100 cm<sup>-1</sup> corresponds to ethers groups (-C-O-C) [65]; the C-O and C-O-C stretching modes are detected at 1132 cm<sup>-1</sup> [61].

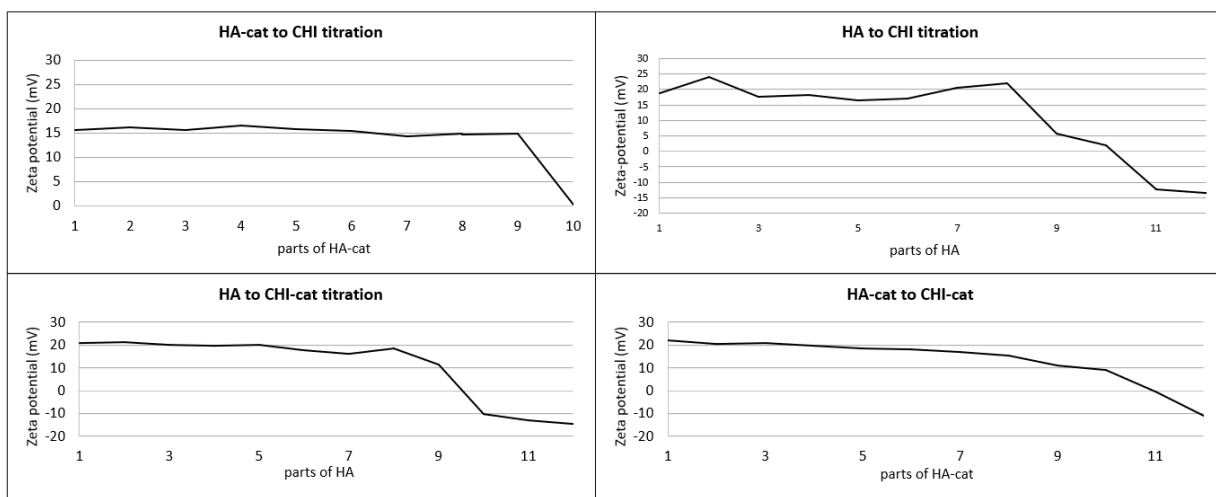

**Figure S2** - Zeta potential titration studies with natural polymers (CHI, HA) and their respective catechol-conjugates (CHI-cat, HA-cat).

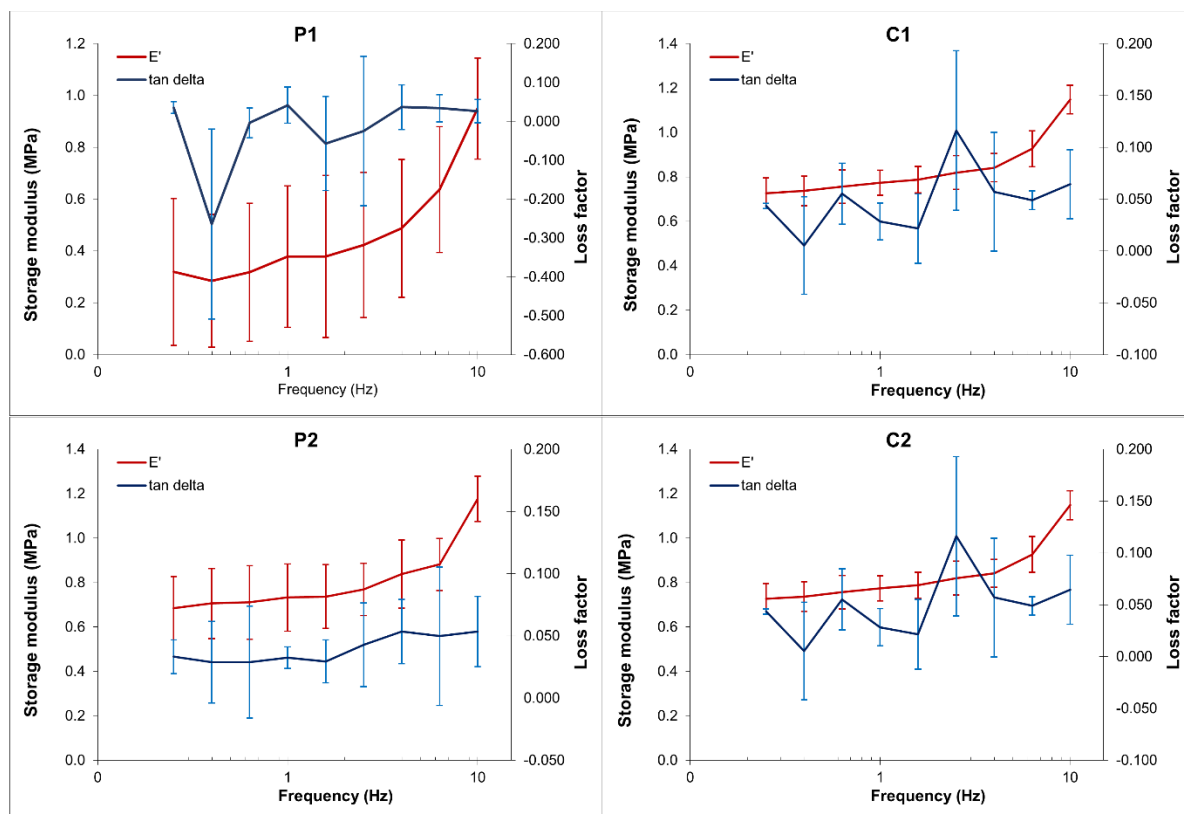

**Figure S3** – DMA spectra with the storage modulus ( $E'$ ) and the loss factor ( $E''/E'$ ) as a function of the frequency obtained for CoPEC membranes P1, P2, C1 and C2 hydrated in PBS solution at 37°C.

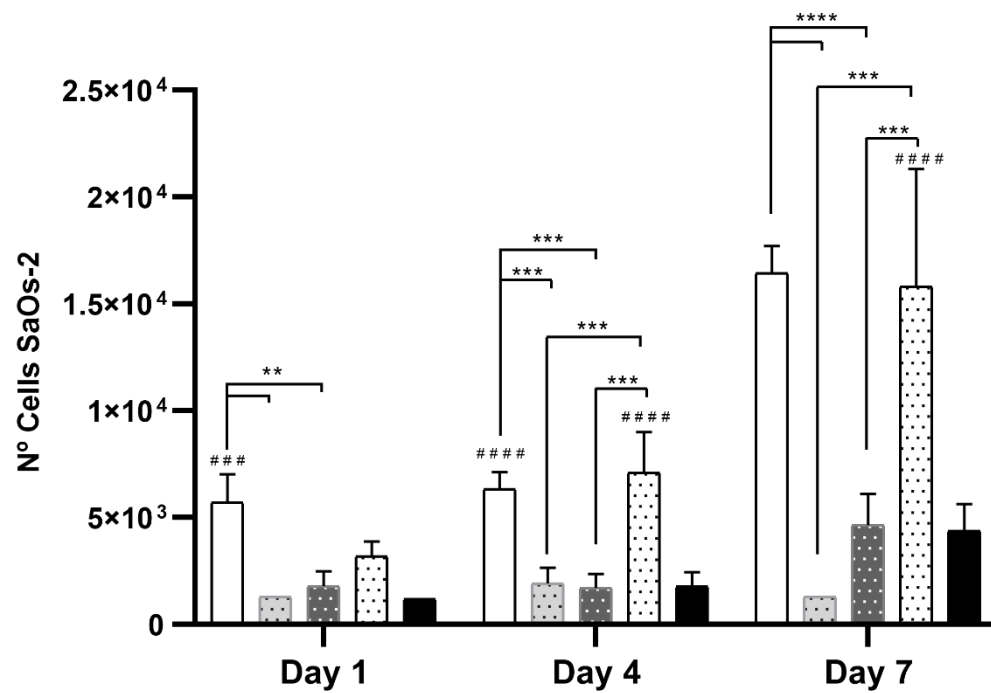

**Figure S4** - DNA assay: Estimated number of SaOs-2 cells after 1, 4 and 7 days. Significant differences were found for  $p < 0.01$  (\*\*),  $p < 0.001$  (\*\*\*), and  $p < 0.0001$  (\*\*\*\*). Significant differences between any condition with the control (CTRL) are represented as (#).
